# Supplementary material for: A ratiometric and lifetime-based luminescent thermometer exploiting the Co3+ luminescence in CaAl2O4:Co3+ and CaAl2O4:Co3+,Nd3+
Source: Royal Society of Chemistry journal article supplement (doi:10.1039/d2tc00952h), 2022-01-01
Supplement: d2tc00952h1.pdf [file d2tc00952h1.pdf]

Supporting Information

**Ratiometric and lifetime-based luminescent thermometer exploiting the  
Co<sup>3+</sup> luminescence in CaAl<sub>2</sub>O<sub>4</sub>:Co<sup>3+</sup> and CaAl<sub>2</sub>O<sub>4</sub>:Co<sup>3+</sup>,Nd<sup>3+</sup>**

K. Kniec<sup>1\*</sup>, A. Kochanowska<sup>1</sup>, L. Li<sup>2</sup>, M. Suta<sup>3</sup>, L. Marciniak<sup>1\*</sup>

<sup>1</sup>Institute of Low Temperature and Structure Research, Polish Academy of Sciences, Okólna 2, 50-422 Wrocław,  
Poland

<sup>2</sup>Hebei Key Laboratory of Optic-electronic Information and Materials, College of Physics Science and  
Technology, Hebei University, Baoding 071002, China

<sup>3</sup>Inorganic Photoactive Materials, Institute of Inorganic Chemistry, Heinrich Heine University Düsseldorf,  
Universitätsstraße 1, 40225 Düsseldorf, Germany

\* corresponding author: k.kniec@intibs.pl, l.marciniak@intibs.pl

**KEYWORDS** luminescence thermometry, nanocrystals, cobalt, luminescence, lifetime-based  
luminescence thermometer

The average decay time of the broad-band luminescence of Co<sup>3+</sup> was calculated with equation S1:

$$\tau_{avr} = \frac{A_1\tau_1^2 + A_2\tau_2^2}{A_1\tau_1 + A_2\tau_2} \quad (S1)$$

for a biexponential decay,

$$y = y_0 + A_1 \cdot \exp\left(-\frac{x}{\tau_1}\right) + A_2 \cdot \exp\left(-\frac{x}{\tau_2}\right) \quad (S2)$$

where:  $\tau_1$ ,  $\tau_2$  – decay components of biexponential decay and  
 $A_1$ ,  $A_2$  – amplitudes.  $y_0$  denotes an experimental background of the decay curve.

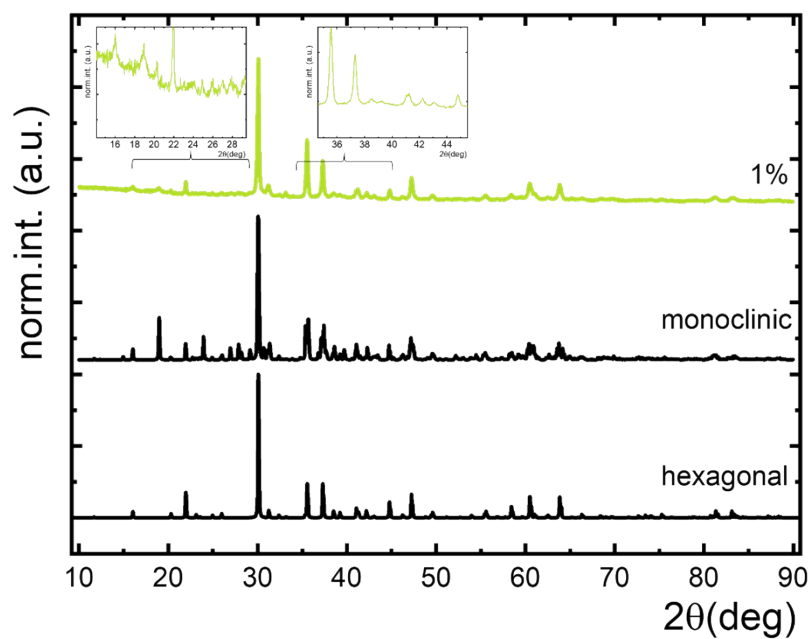

**Figure S1.** Comparison of the powder X-ray diffraction patterns of  $\text{CaAl}_2\text{O}_4$  doped with 1%  $\text{Co}^{3+}$  annealed at 850 °C with reference patterns (ICSD 157457 -hexagonal  $\text{CaAl}_2\text{O}_4$  and ICSD 260 – monoclinic  $\text{CaAl}_2\text{O}_4$ ).

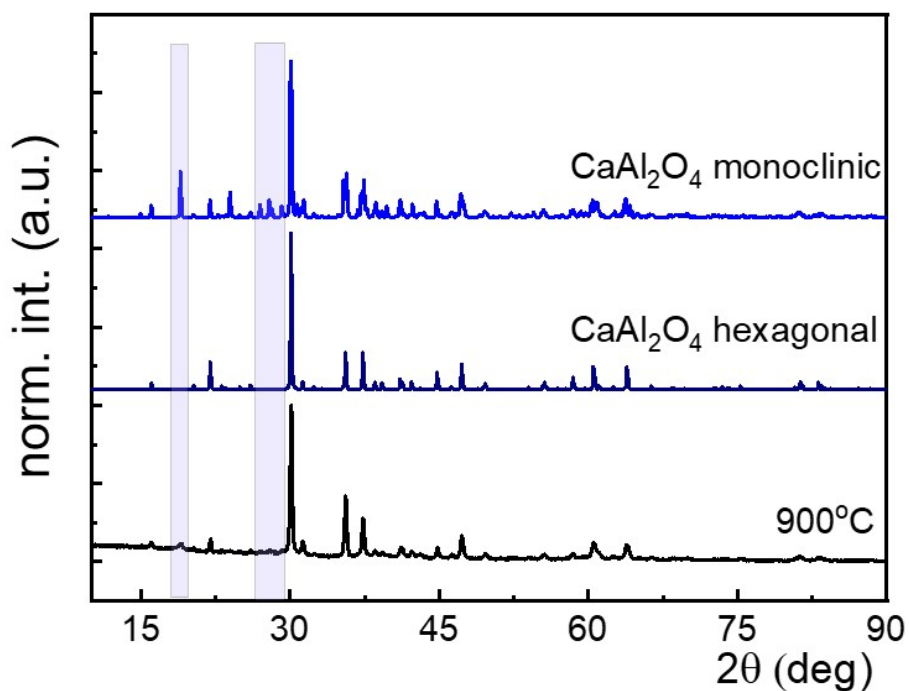

**Figure S2.** Comparison of powder X-ray diffraction patterns of  $\text{CaAl}_2\text{O}_4: \text{Co}^{3+}$  annealed at 900 °C with reference patterns (ICSD 157457 -hexagonal  $\text{CaAl}_2\text{O}_4$  and ICSD 260 – monoclinic  $\text{CaAl}_2\text{O}_4$ ).

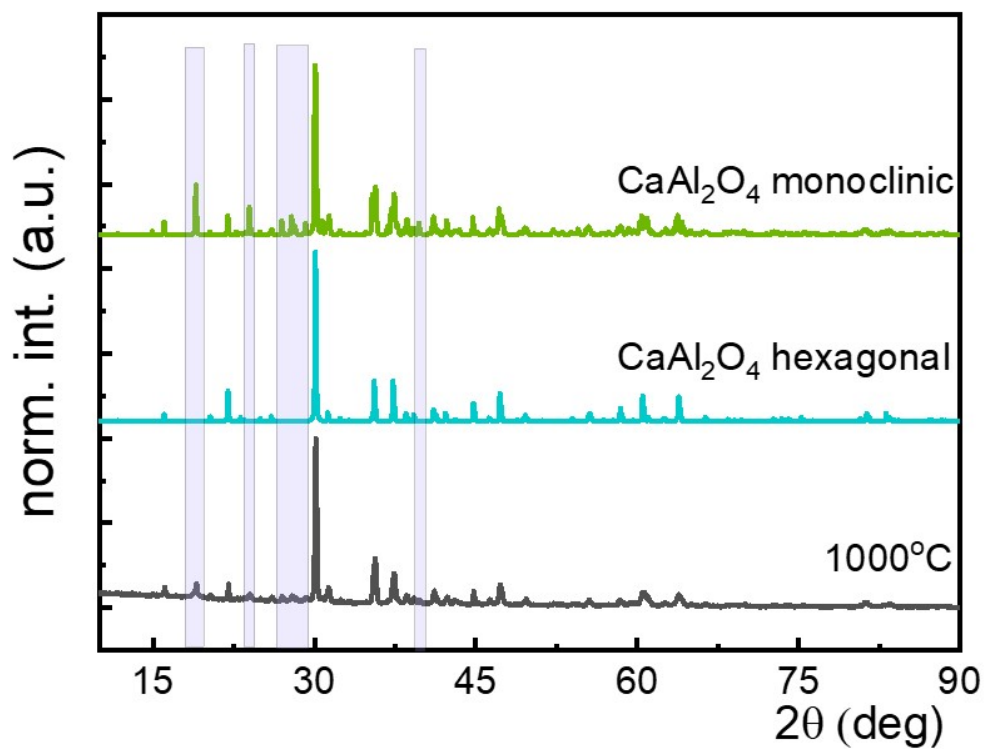

**Figure S3.** Comparison of powder X-ray diffraction patterns of CaAl<sub>2</sub>O<sub>4</sub>: Co<sup>3+</sup> annealed at 1000 °C with reference patterns (ICSD 157457 -hexagonal CaAl<sub>2</sub>O<sub>4</sub> and ICSD 260 – monoclinic CaAl<sub>2</sub>O<sub>4</sub>).

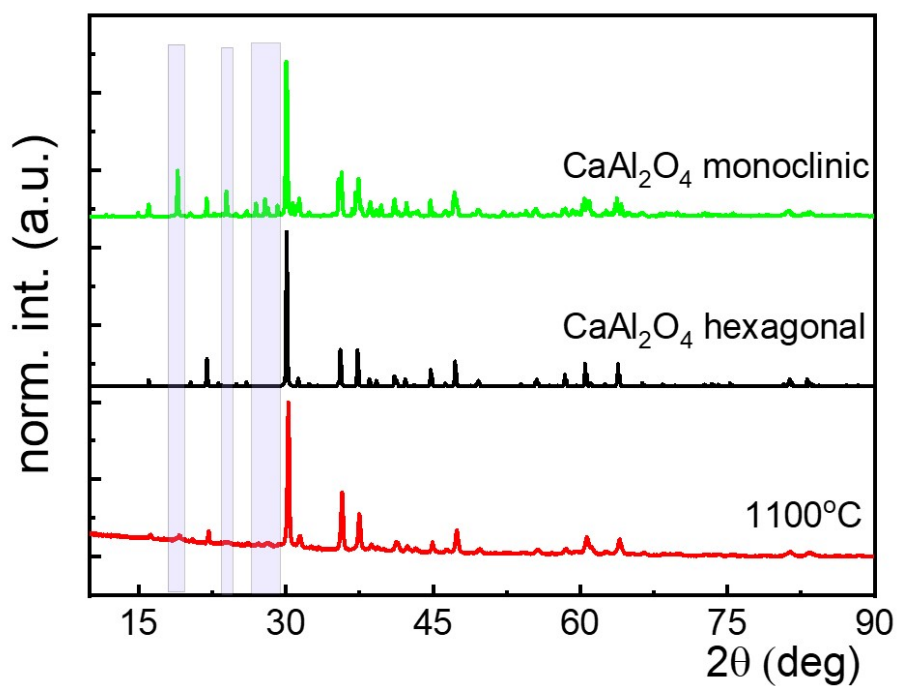

**Figure S4.** Comparison of powder X-ray diffraction patterns of CaAl<sub>2</sub>O<sub>4</sub>: Co<sup>3+</sup> annealed at 1100°C with reference patterns (ICSD 157457 -hexagonal CaAl<sub>2</sub>O<sub>4</sub> and ICSD 260 – monoclinic CaAl<sub>2</sub>O<sub>4</sub>).

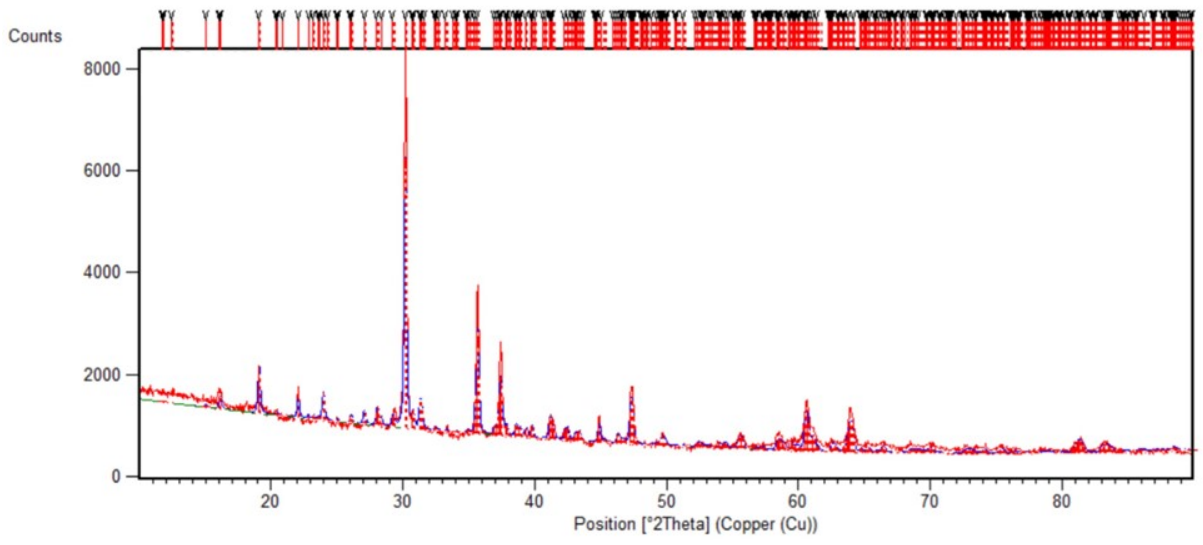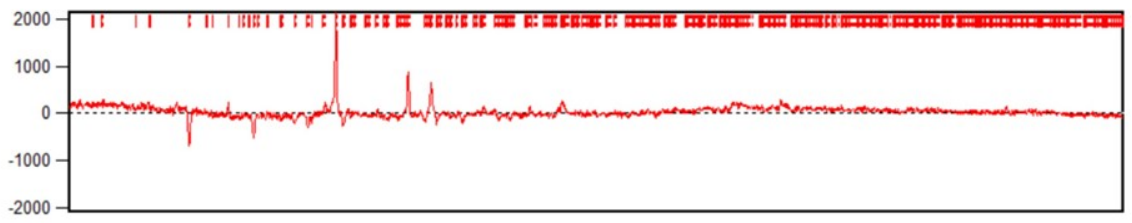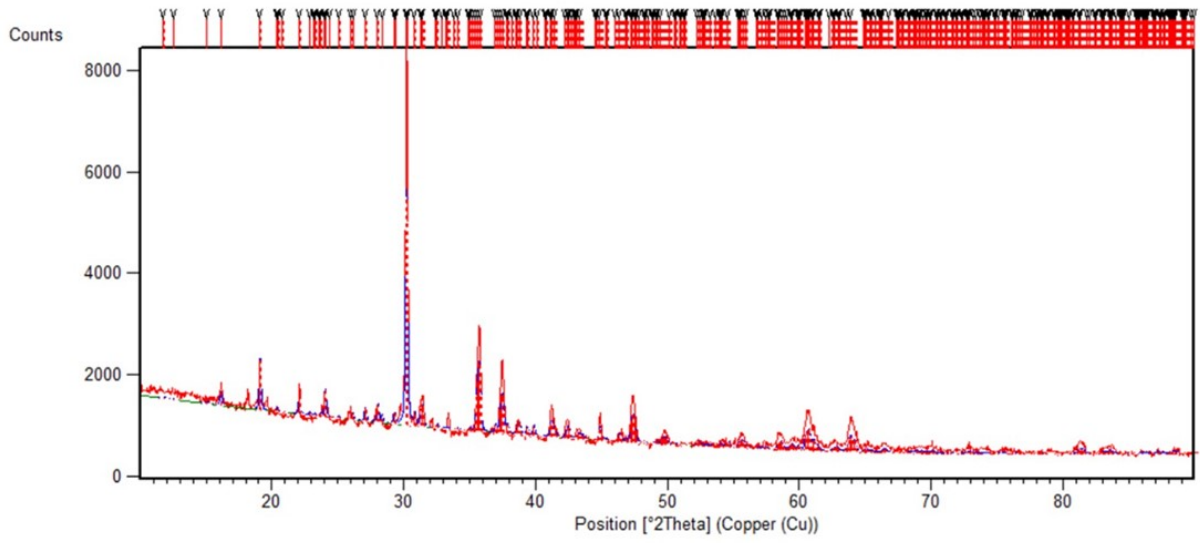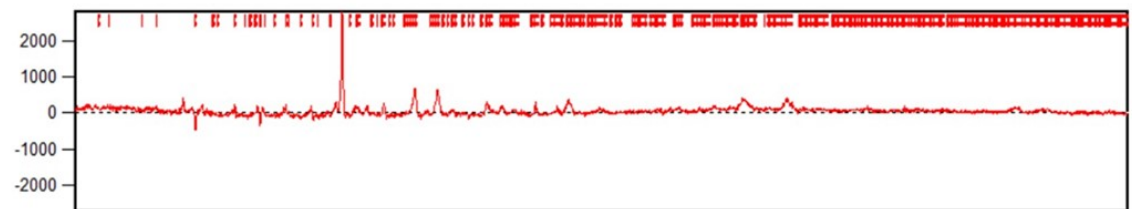

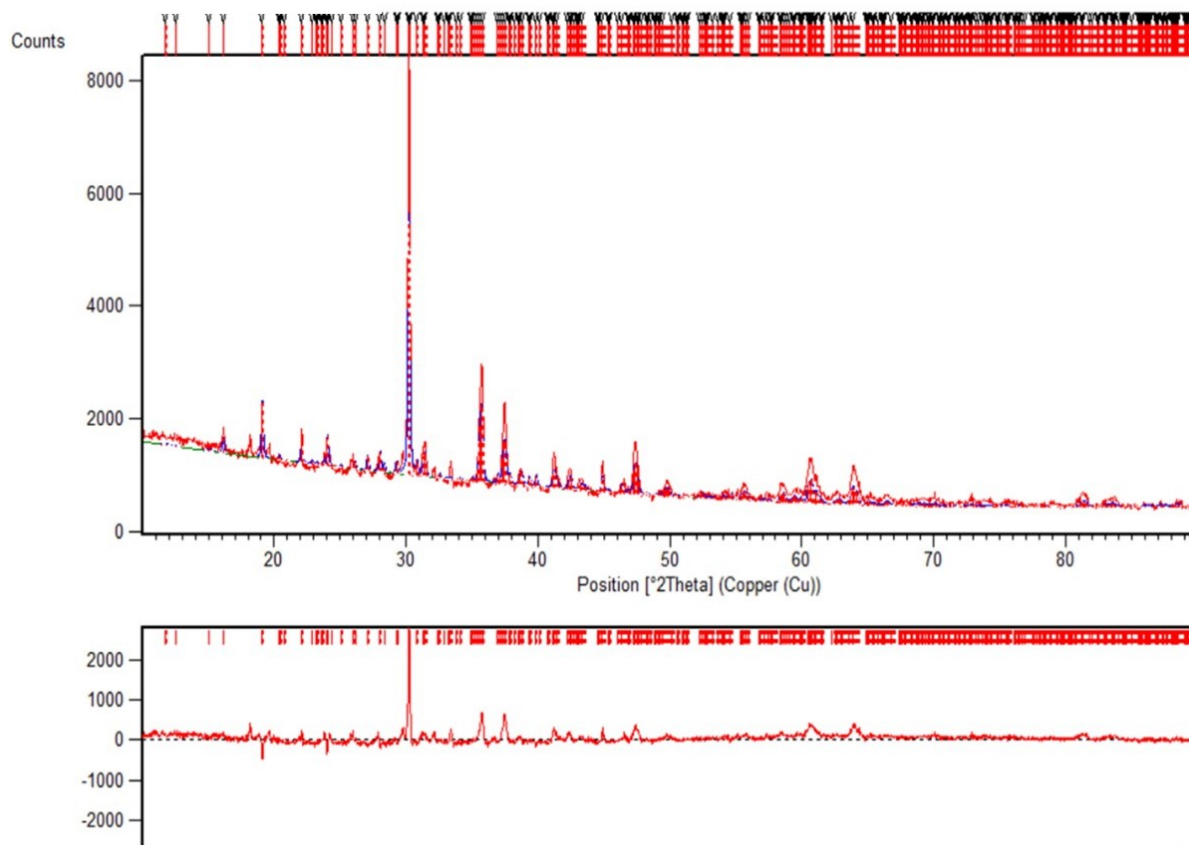

**Figure S5.** The representative results of the Rietveld refinement of the  $\text{CaAl}_2\text{O}_4:\text{Co}^{3+}$  annealed at  $1000^\circ\text{C}$ -a); the  $\text{CaAl}_2\text{O}_4:\text{Co}^{3+}$  annealed at  $1100^\circ\text{C}$ -b); and the  $\text{CaAl}_2\text{O}_4:\text{Co}^{3+},\text{Nd}^{3+}$  annealed at  $1100^\circ\text{C}$ -c)

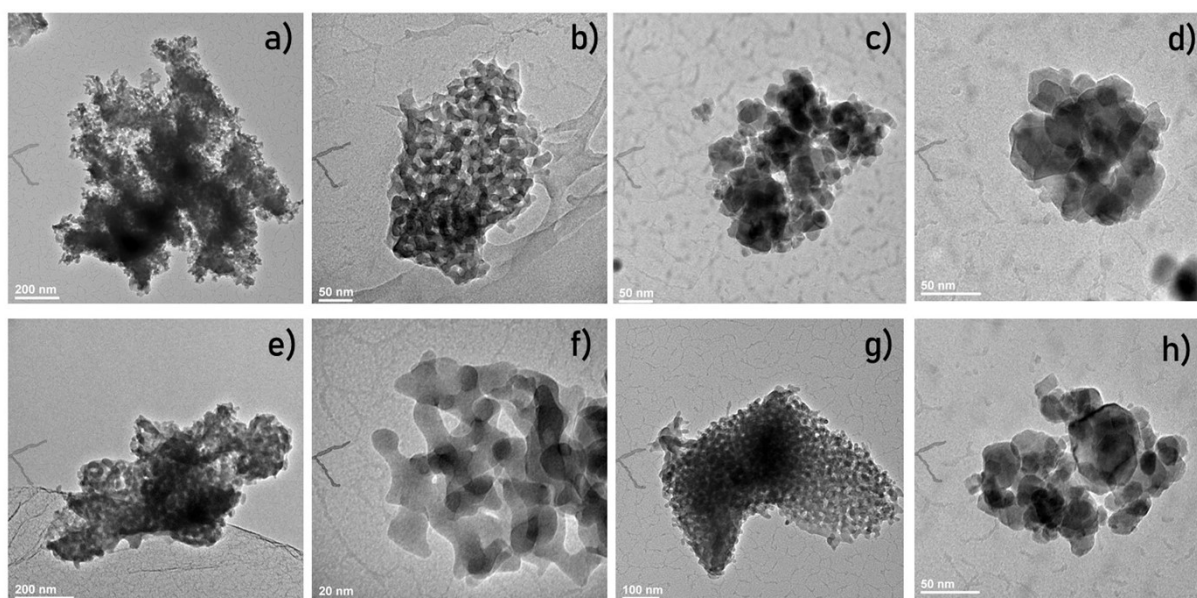

**Figure S6.** The representative TEM images of  $\text{CaAl}_2\text{O}_4:\text{Co}^{3+}$  -a), b), c), d) and  $\text{CaAl}_2\text{O}_4:\text{Co}^{3+},\text{Nd}^{3+}$  -e), f), g), h) annealed at  $850^\circ\text{C}$  -a), -e);  $900^\circ\text{C}$  -b), -f);  $1000^\circ\text{C}$  -c);-g) and  $1100^\circ\text{C}$  -d); -h).

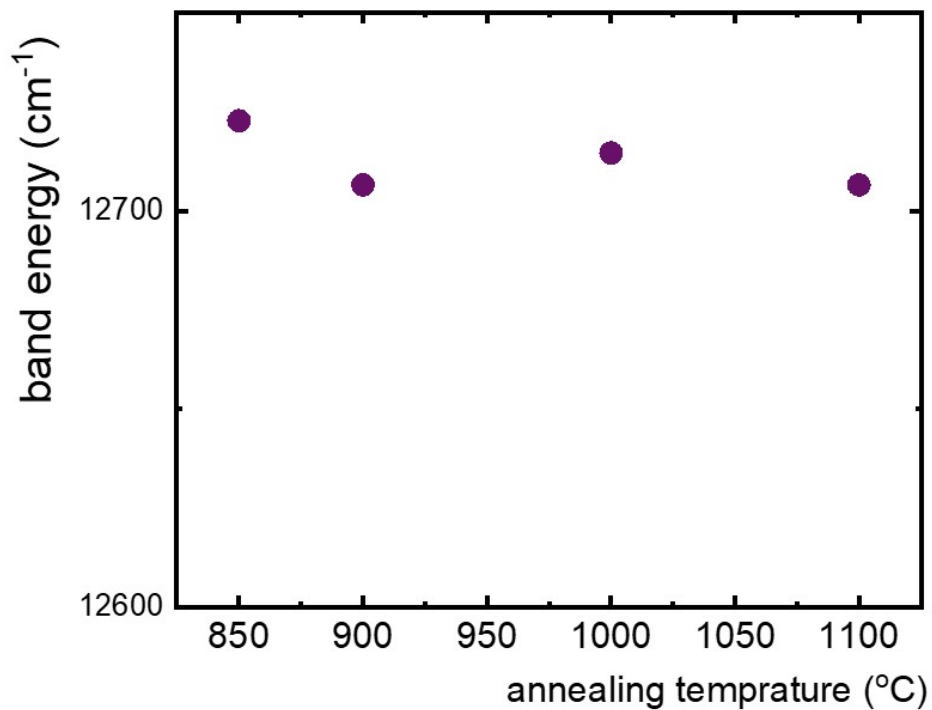

**Figure S7.** Energy of the maximum of the  $\text{Co}^{3+}$ -related broad-band emission as a function of annealing temperature of the prepared  $\text{CaAl}_2\text{O}_4: 0.02\% \text{Co}^{3+}$  sample.

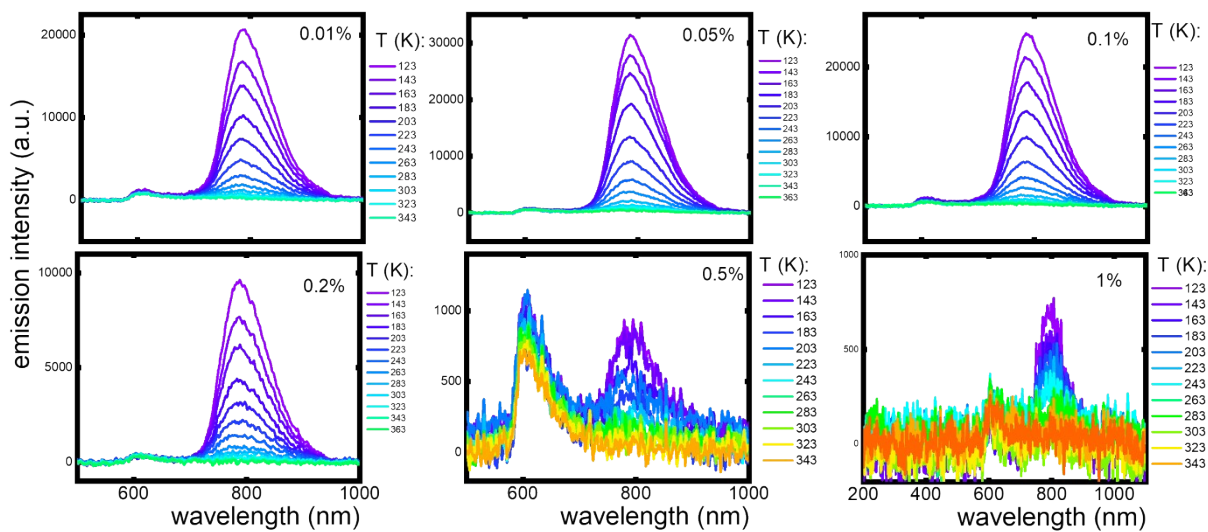

**Figure S8.** Temperature-dependent emission spectra of  $\text{CaAl}_2\text{O}_4$  activated with  $\text{Co}^{3+}$  ions with varying doping fraction (emission spectra obtained upon  $\lambda_{\text{exc}}=445$  nm using 590 longpass filter, artificial band at 600 nm results from experimental conditions).

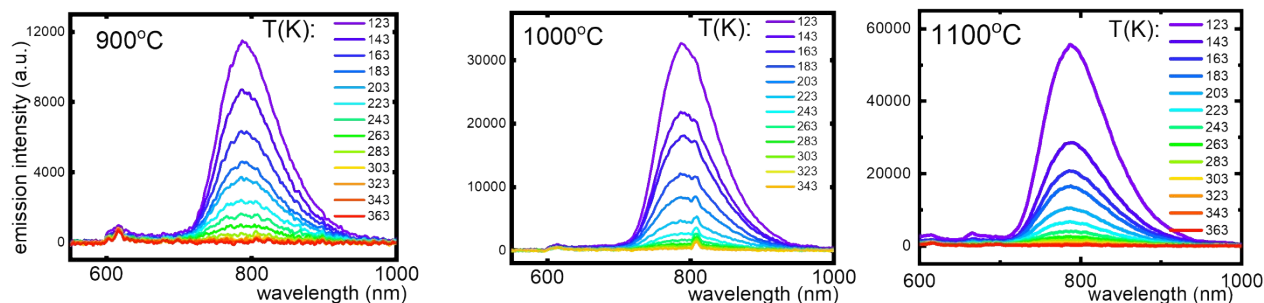

**Figure S9.** Temperature dependence of  $\text{CaAl}_2\text{O}_4: 0.02\% \text{Co}^{3+}$  ions prepared by annealing at varying temperatures (emission spectra obtained upon  $\lambda_{\text{exc}}=445$  nm using 590 longpass filter, artificial band at 600 nm and 800 nm results from experimental conditions).

$$\ln\left(\frac{I_0}{I_{em}} - 1\right) = -\Delta E_a \cdot \frac{1}{k_B T} \quad (\text{Eq. S3})$$

where  $I_0$  corresponds to the initial emission intensity (at 123 K) and  $k_B$  is Boltzmann constant

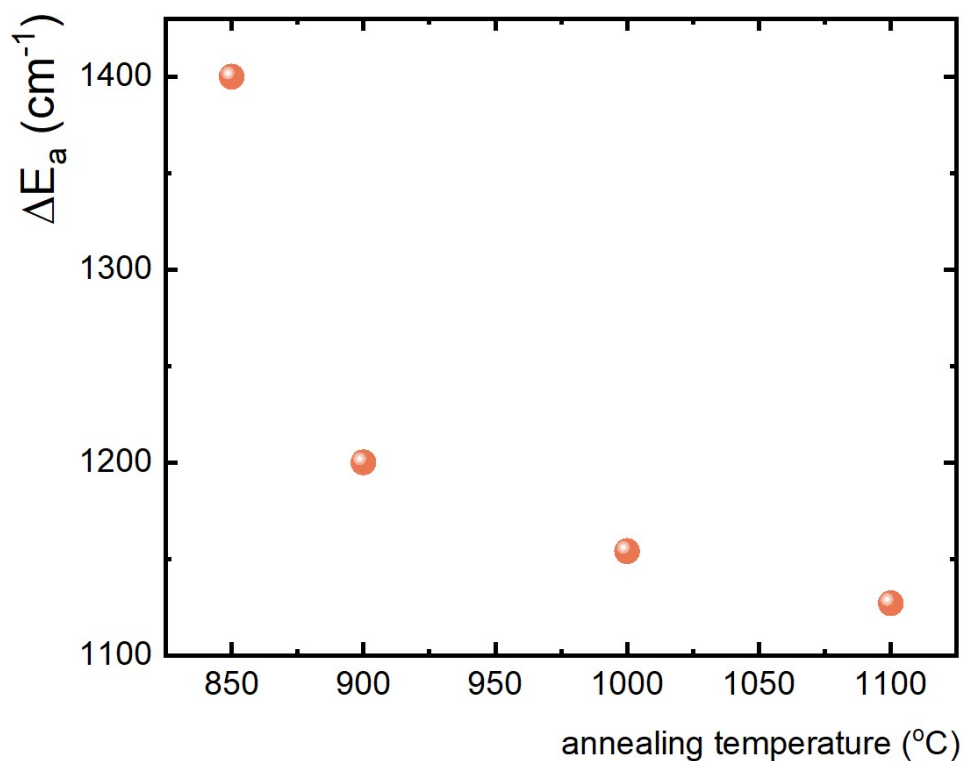

**Figure S10.** The dependence of the derived thermal crossover activation barrier on the annealing temperature of the prepared  $\text{CaAl}_2\text{O}_4: 0.02\% \text{Co}^{3+}$  powders.

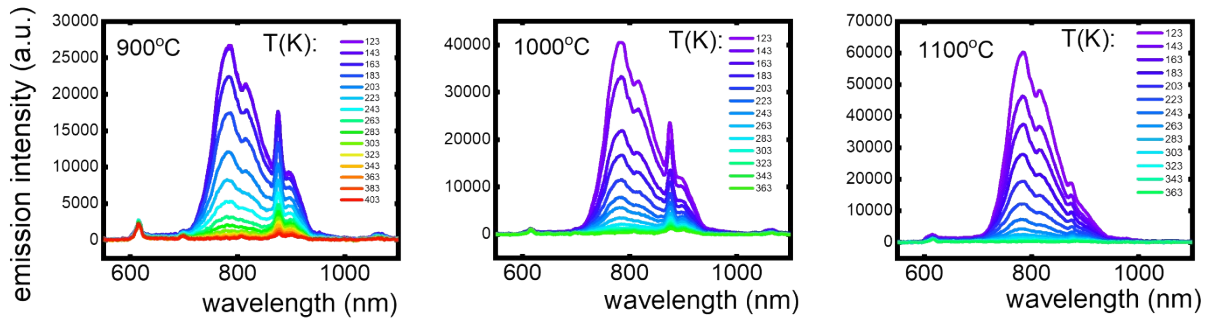

**Figure S11.** Temperature dependence of the emission spectra of  $\text{CaAl}_2\text{O}_4:\text{Co}^{3+}, \text{Nd}^{3+}$  prepared by varying annealing temperatures (emission spectra obtained upon  $\lambda_{\text{exc}}=445$  nm using 590 longpass filter, artificial band at 600 nm and 800 nm results from experimental conditions).

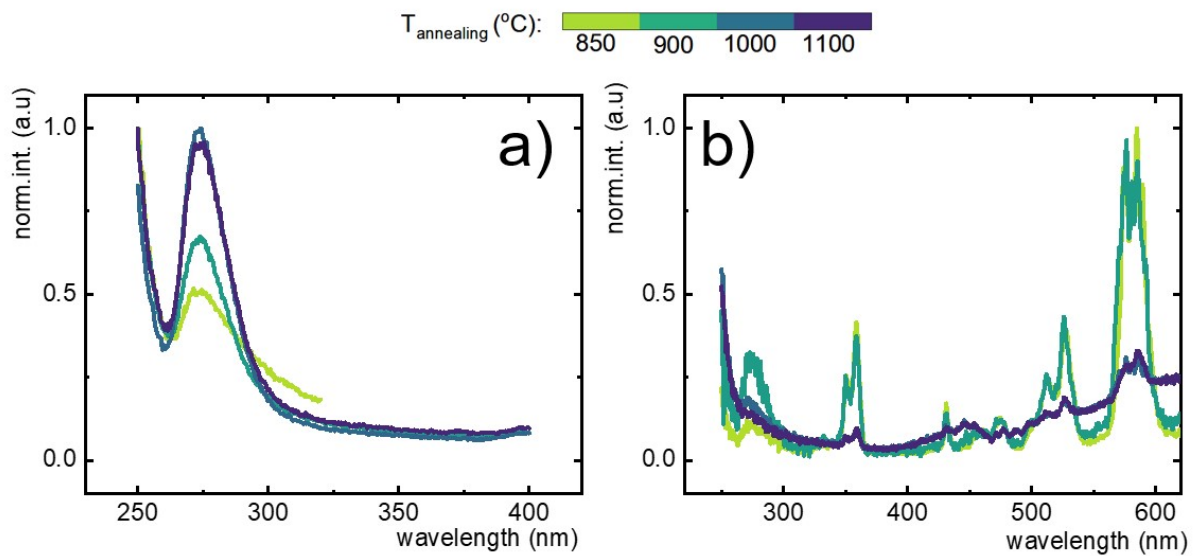

**Figure S12.** Excitation spectra upon detection of the  $\text{Nd}^{3+}$ -related emission ( $\lambda_{\text{em}}=1064$  nm) of  $\text{CaAl}_2\text{O}_4:0.02\%\text{Co}^{3+}, 1\%\text{Nd}^{3+}$  at 123 K and 303 K – a) and – b), respectively.



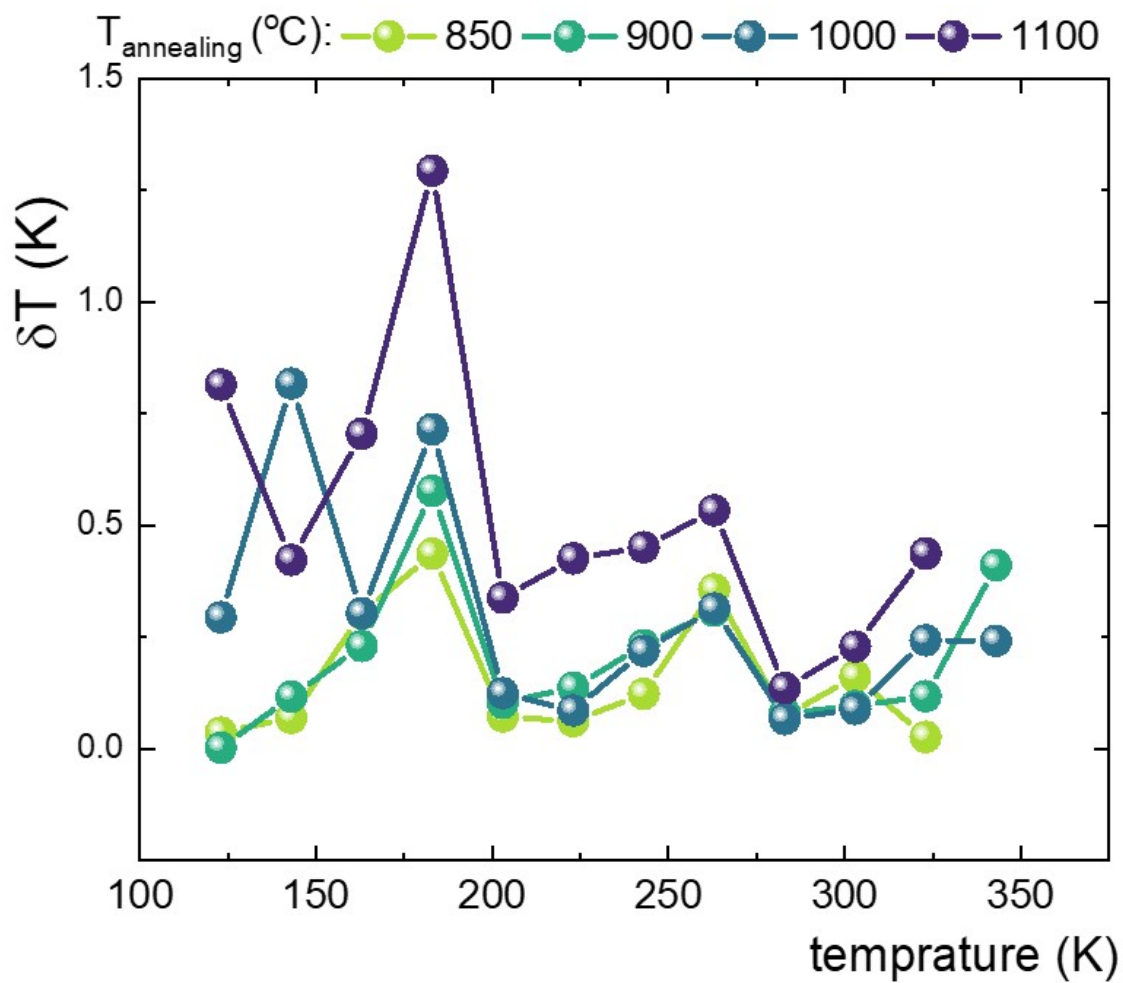

**Figure S13.** The statistical temperature uncertainty of the conceptualized ratiometric  $\text{Co}^{3+}$ ,  $\text{Nd}^{3+}$ -co-doped  $\text{CaAl}_2\text{O}_4$  luminescence thermometers.

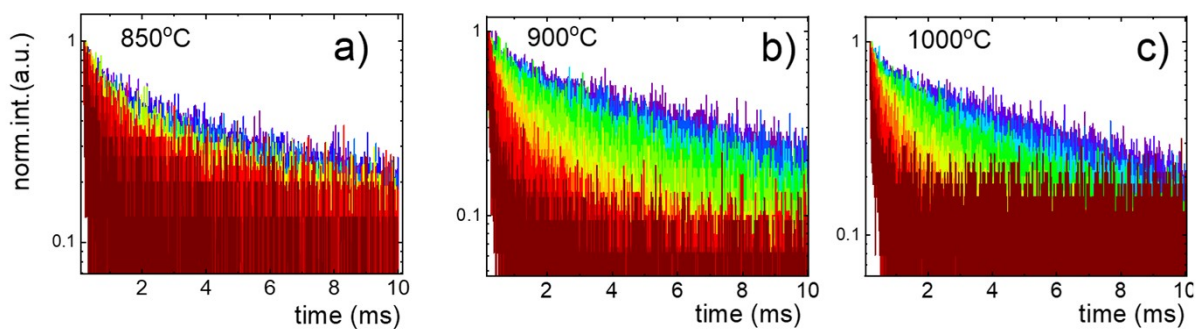

**Figure S14.** Temperature-dependent time-resolved luminescence of 0.02% $\text{Co}^{3+}$ -doped  $\text{CaAl}_2\text{O}_4$  ( $\lambda_{\text{exc}}=266$  nm)  $\lambda_{\text{em}}=800$  nm) annealed at 850°C -a), 900°C -b) and 1000°C -c).

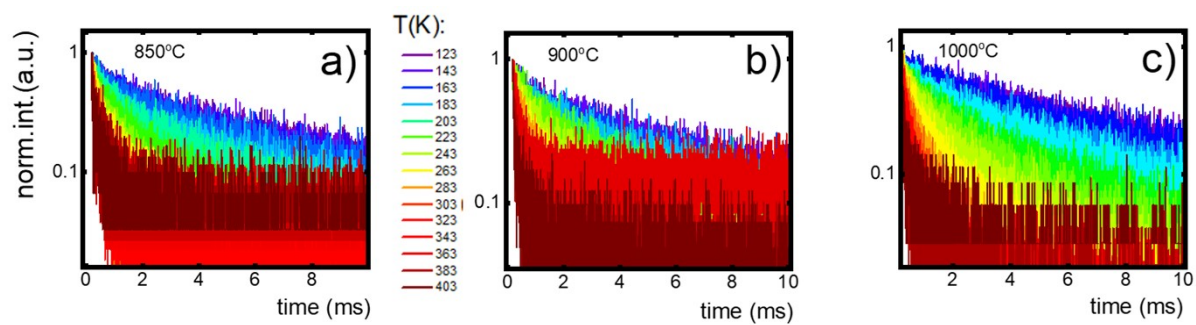

**Figure S15.** Temperature-dependent time-resolved luminescence of 0.02%Co<sup>3+</sup>, 1%Nd<sup>3+</sup>-co-doped CaAl<sub>2</sub>O<sub>4</sub> ( $\lambda_{exc}=266$  nm)  $\lambda_{em}=800$  nm) annealed at 850°C -a), 900°C -b) and 1000°C -c).
